# Supplementary material
Source: Research Square preprint supplement (doi:10.21203/rs.3.rs-9327225/v1)
Supplement: Supplementary file 1 [file d44c4ab93077ba07e38b4700.docx]

**Table 1.** Epidermal Thermal Risk Index (ETRI, %) across wavelengths and phototypes

| **Phototype** | **532 nm** | **755 nm** | **808 nm** | **1064 nm** | **Risk Trend** |
| --- | --- | --- | --- | --- | --- |
| I | 28.2 ± 0.13 | 15.7 ± 0.06 | 15.4 ± 0.09 | 10.7 ± 0.04 | LOW |
| II | 41.1 ± 0.10 | 24.0 ± 0.16 | 23.2 ± 0.08 | 15.3 ± 0.05 | LOW–MOD |
| III | 56.0 ± 0.22 | 36.3 ± 0.18 | 34.5 ± 0.07 | 23.0 ± 0.09 | MOD |
| IV | 70.0 ± 0.15 | 50.1 ± 0.20 | 47.6 ± 0.09 | 33.5 ± 0.19 | MOD–HIGH |
| V | 80.5 ± 0.08 | 61.4 ± 0.12 | 58.3 ± 0.08 | 43.7 ± 0.14 | HIGH |
| VI | 90.7 ± 0.12 | 73.0 ± 0.20 | 69.2 ± 0.12 | 55.0 ± 0.25 | HIGH |

*Values are presented as mean ± SD (n = 5 independent runs). Risk categories: LOW (<30%, green), MOD (30–50%, yellow), HIGH (>50%, red).*

**Table 2.** Benefit–Risk Ratio (BRR = Edermis / Eepidermis) across wavelengths and phototypes

| **Phototype** | **532 nm** | **755 nm** | **808 nm** | **1064 nm** |
| --- | --- | --- | --- | --- |
| I | 2.55 ± 0.02 | 5.37 ± 0.03 | 5.50 ± 0.04 | 8.32 ± 0.03 |
| II | 1.43 ± 0.01 | 3.16 ± 0.03 | 3.32 ± 0.01 | 5.52 ± 0.02 |
| III | 0.78 ± 0.01 | 1.76 ± 0.01 | 1.90 ± 0.01 | 3.36 ± 0.02 |
| IV | 0.43 ± 0.00 | 1.00 ± 0.01 | 1.10 ± 0.00 | 1.99 ± 0.02 |
| V | 0.24 ± 0.00 | 0.63 ± 0.00 | 0.72 ± 0.00 | 1.29 ± 0.01 |
| VI | 0.10 ± 0.00 | 0.37 ± 0.00 | 0.44 ± 0.00 | 0.82 ± 0.01 |

*Values are presented as mean ± SD (n = 5 independent runs). BRR > 1 indicates greater dermal than epidermal energy deposition.*

**Table 3.** Composite Score and optimal wavelength by phototype

| **Phototype** | **532 nm** | **755 nm** | **808 nm** | **1064 nm** | **Optimal** |
| --- | --- | --- | --- | --- | --- |
| I | 0.54 | 0.79 | 0.80 | 1.00 | 1064 nm |
| II | 0.39 | 0.60 | 0.62 | 0.80 | 1064 nm |
| III | 0.26 | 0.44 | 0.46 | 0.62 | 1064 nm |
| IV | 0.15 | 0.31 | 0.33 | 0.47 | 1064 nm |
| V | 0.07 | 0.22 | 0.24 | 0.37 | 1064 nm |
| VI | 0.00 | 0.13 | 0.16 | 0.27 | 1064 nm |

*Composite Score = 0.5 × (1 – ETRI_norm) + 0.5 × BRR_norm. Higher scores indicate more favorable balance of safety and efficacy. Green shading indicates optimal wavelength for each phototype.*

**Table 4.** Clinical decision support matrix for wavelength selection

| **Phototype** | **532 nm** | **755 nm** | **808 nm** | **1064 nm** |
| --- | --- | --- | --- | --- |
| I | Recommended | Recommended | Recommended | Recommended |
| II | Caution | Recommended | Recommended | Recommended |
| III | Caution | Caution | Caution | Recommended |
| IV | Avoid | Caution | Caution | Caution |
| V | Avoid | Avoid | Avoid | Caution |
| VI | Avoid | Avoid | Avoid | Caution |

*Recommended (green): Composite Score ≥0.50; Use with Caution (yellow): Score 0.25–0.49; Avoid (red): Score <0.25. Recommendations are simulation-derived and should be integrated with clinical judgment and individual patient factors.*
